# Supplementary material for: Hierarchical Ag Nanostructures Fabricated from Silver Coordination Polymers for Antibacterial Surface
Source: MDPI journal article supplement (doi:10.3390/polym11010155), 2019-01-17
Supplement: s1 [file s1]

# Microanalysis Report

Prepared for: Company Name Here

Prepared by: Your Name Here

1/10/2019

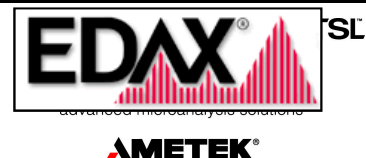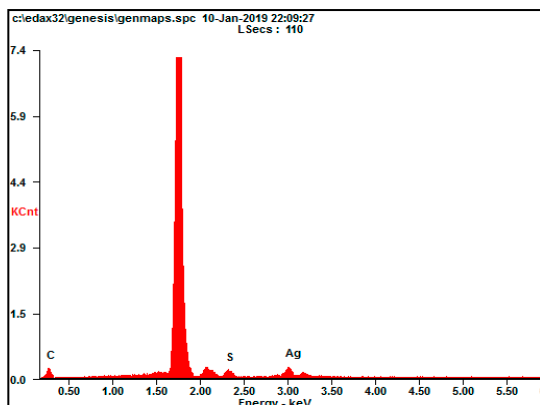

| Element | Wt%        | At%   |
|---------|------------|-------|
| CK      | 57.16      | 89.26 |
| SK      | 08.00      | 04.68 |
| AgL     | 34.84      | 06.06 |
| Matrix  | Correction | ZAF   |

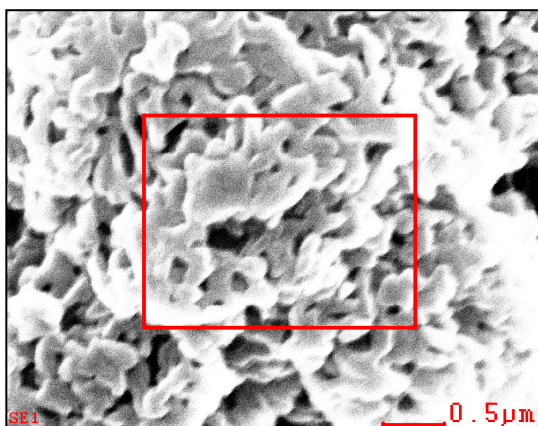

Chemical formula for Ag-C18:C<sub>18</sub>H<sub>37</sub>S·Ag

| Element | Theoretical value<br>(wt%) | EDS analysis<br>(wt%) |
|---------|----------------------------|-----------------------|
| C       | 55.0                       | 57.2                  |
| S       | 8.15                       | 8.00                  |
| Ag      | 27.4                       | 34.8                  |
